# Supplementary material for: The reflective component of the Mellow Bumps parenting intervention: Implementation, engagement and mechanisms of change
Source: PLOS journal article supplement (doi:10.1371/journal.pone.0215461), 2019-04-16
Supplement: S3 (10.1371/journal.pone.0215461.s003) [file journal.pone.0215461.s003]

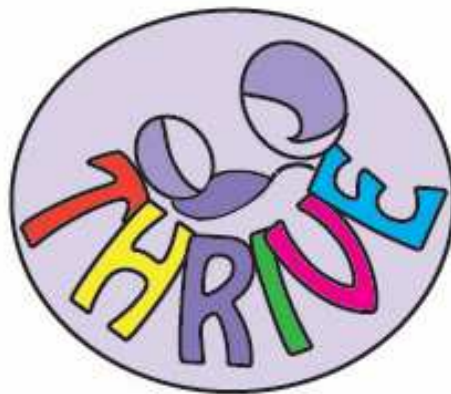

Trial of **H**ealthy **R**elationship Initiatives for the **V**ery **E**arly-years

# **PRACTITIONER INTERVIEW SCHEDULE TIME 1**

## **SECTION 1: WARM UP**

Tell me about your professional background

- How did you get to where you are today?
- Previous roles and how relate to current role

## **SECTION 2: PREVIOUS EXPERIENCE WORKING WITH VULNERABLE FAMILIES**

What experience do you have working with vulnerable families?

What would be your 'normal' care plan for vulnerable woman?

- What organisations would be involved in their care?
  - Statutory
  - Third sector?

## **SECTION 3: UNDERSTANDINGS OF THE PROJECT**

Before you heard about this project, were you aware of either of the antenatal programmes

- Previous experiences
- Perceived benefits or drawbacks?
  - Any concerns?

Did you feel happy to refer to the project?

- Did you feel you had sufficient information?
- Types of women you referred
- Were there many women you approached and they declined to take part?
  - Did they give any reasons?
- Was there anyone you chose not to refer?
  - Why?
- Were there any barriers to referral?
  - Appropriateness of time frame
  - User-friendliness of referral process

## **SECTION 4: ATTITUDES ABOUT RESEARCH**

Have you had any previous experience of being involved with a research project?

- Perceived benefits or drawbacks?
- Any concerns?
